# Supplementary material for: Agrobacterium-Mediated Gene Transient Overexpression and Tobacco Rattle Virus (TRV)-Based Gene Silencing in Cassava
Source: PubMed Central journal article supplement (PMC6719147; doi:10.3390/ijms20163976), 2019-08-15
Supplement: ijms-20-03976-s001.pdf [file ijms-20-03976-s001.pdf]

**Table S1. The primers used for vector construction.**

| Gene         | Primer | Sequence                           | Vector construction |
|--------------|--------|------------------------------------|---------------------|
| <i>MePDS</i> | MePDSF | CCGGAATTCGTGGAAAGGTGGC<br>TGCGTGGA | MePDS-pTRV2         |
|              | MePDSR | CGCGGATCCTGCTTTCTCATCCA<br>ATCTTG  |                     |

**Table S2. The primers used for reverse-transcription PCR.**

| Gene         | Primer  | Sequence                 |
|--------------|---------|--------------------------|
| <i>MeEF1</i> | QMeEF1F | TGAACCACCCTGGTCAGATTGGAA |
|              | QMeEF1R | AACTTGGGCTCCTTCTCAAGCTCT |
| <i>GFP</i>   | SQGFPF  | ATGGTGAGCAAGGGCGAGGA     |
|              | SQGFPR  | AGATCCGGTGGATCCAAGCT     |
| <i>GUS</i>   | SQGUSF  | ATGTTACGTCCTGTAGAAAC     |
|              | SQGUSR  | TCATTGTTGCCTCCCTGCT      |

**Table S3. The primers used for quantitative real-time PCR.**

| Gene         | Primer  | Sequence                 |
|--------------|---------|--------------------------|
| <i>MeEF1</i> | QMeEF1F | TGAACCACCCTGGTCAGATTGGAA |
|              | QMeEF1R | AACTTGGGCTCCTTCTCAAGCTCT |
| <i>MePDS</i> | QMePDSF | CAGCATCCTTCCGCAAT        |
|              | QMePDSR | TCCACGCAGCCACCTTT        |

**Table S4. The primers used for VIGS detection.**

| Sample | Primer   | Sequence             |
|--------|----------|----------------------|
| DNA    | DpTRV1F  | CTACCTGCAGATACGCCT   |
|        | DpTRV1R  | ACTCACCCCCCAATAATC   |
| DNA    | DpTRV2F  | GTTCAATTCATTTGGAGAGG |
|        | DpTRV2R  | AATGTCAATCTCGTAGG    |
| cDNA   | cDpTRV1F | GATAAGGAATTGAACCCG   |
|        | cDpTRV1R | CAAGGTGACTACGGCCA    |
| cDNA   | cDpTRV2F | TCCAGATAAGAAGGTGT    |
|        | cDpTRV2R | TTGTAACCATCATCACT    |

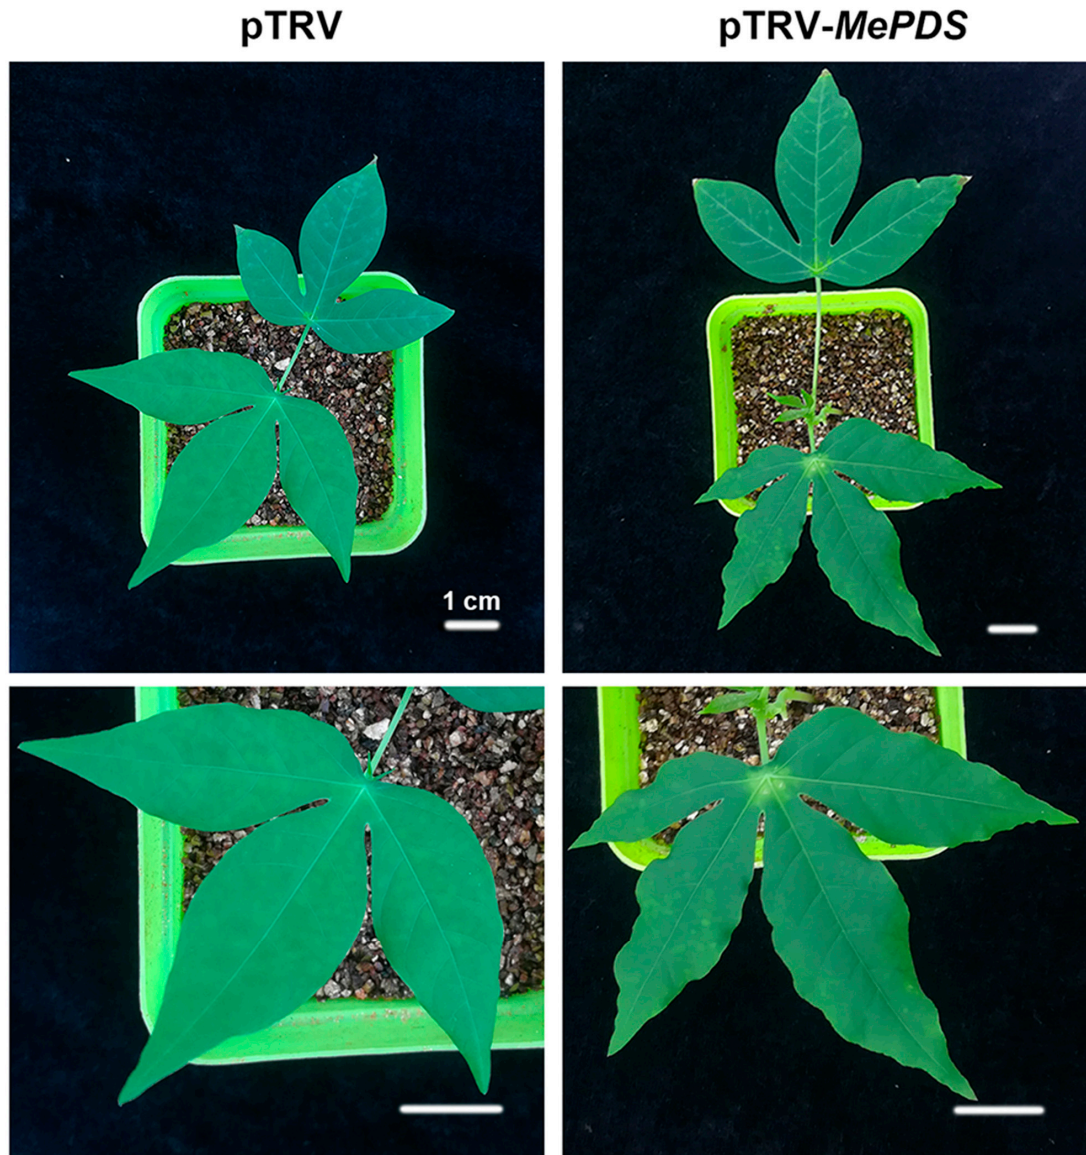

**Figure S1.** The albino cassava inoculated by *Agrobacterium* strain GV3101. The cassavas were inoculated with *Agrobacterium* strain GV3101 containing pTRV1 and pTRV2 vectors were seeded as mock, pTRV1 and pTRV2-*MePDS* were used to test the albino effect. 20 days after inoculation, the upper line shown the whole cassava plants, the underline shown the magnifying leaves. Bar = 1 cm.

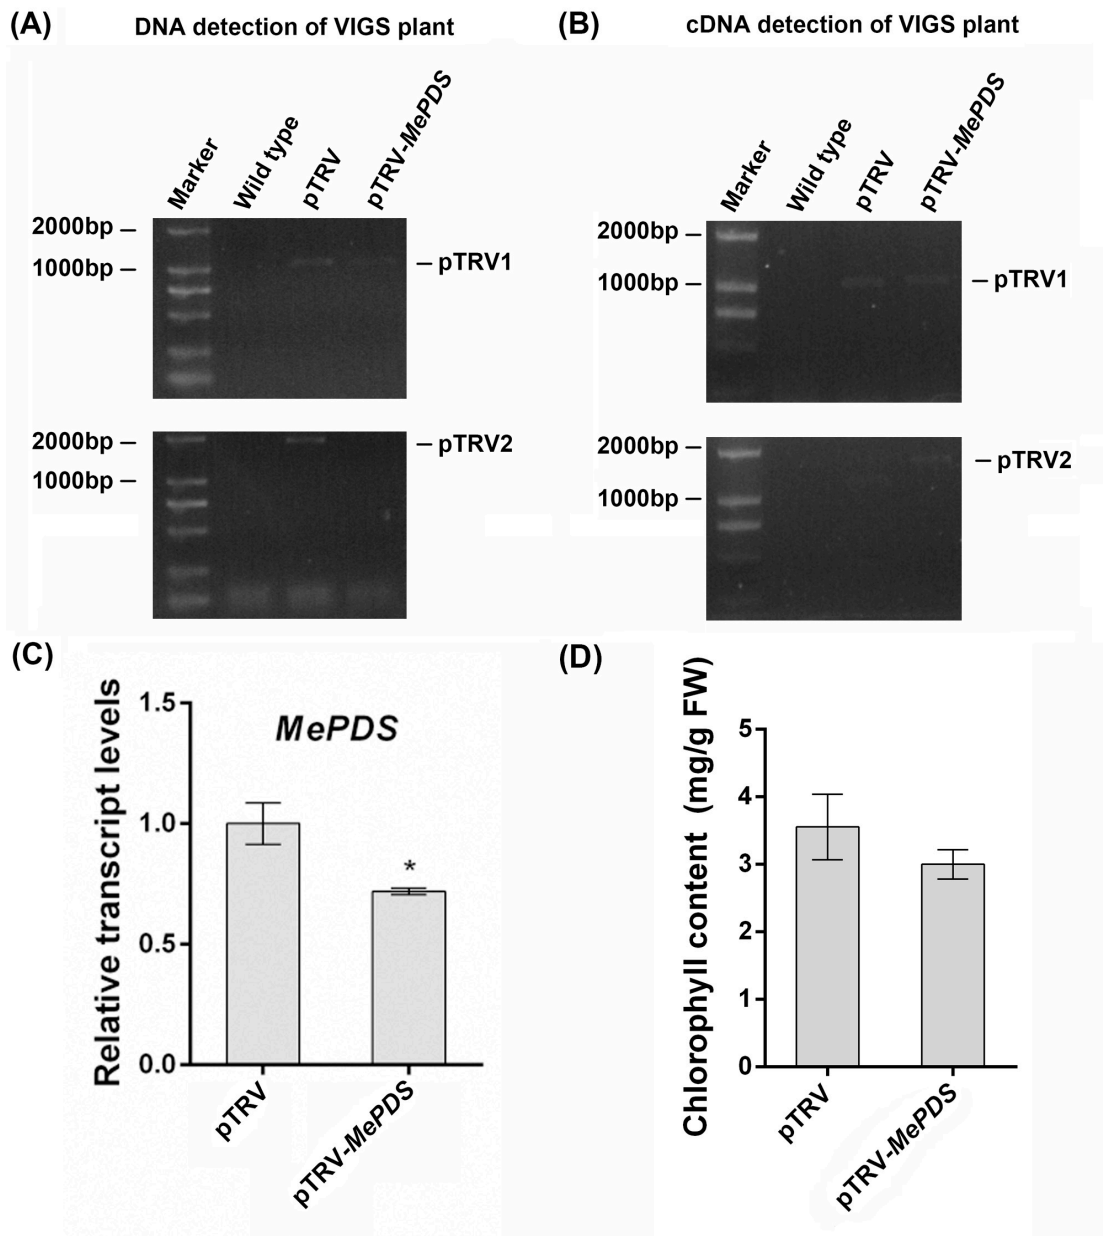

**Figure S2. Detection of VIGS cassava plants inoculated by *Agrobacterium* strain GV3101.** (A) PCR detection of pTRV1 and pTRV2 sequences from the genomic DNA of VIGS cassava plants. (B) RT-PCR detection of pTRV1 and pTRV2 sequences from the cDNA of VIGS cassava plants. (C) The relative transcript levels of *MePDS* of the infiltrated cassava plants. (D) The chlorophyll content in the infiltrated cassava plants. Asterisk symbols (\*) of  $p < 0.05$  were shown by the calculation of student's t-test.
